# Supplementary material for: Integrated “omics” profiling indicates that miRNAs are modulators of the ontogenetic venom composition shift in the Central American rattlesnake, Crotalus simus simus
Source: PubMed Central journal article supplement (PMC3660174; doi:10.1186/1471-2164-14-234), 2013-04-10
Supplement: 1471-2164-14-234-S1.pdf [file 1471-2164-14-234-S1.pdf]

**Table S1.** RepeatMasker usage results and features of the sequence elements masked in the adult *C. s. simus* venom gland transcriptomes. Total contigs analyzed: 6484; Total length of sequences: 5043749 nucleotides; GC level: 41.81% number of bases masked: 97204 (1.93% of the total adult *C. s. simus* venom gland transcriptome).

|                                       | number of elements | nucleotides | % contig sequences |
|---------------------------------------|--------------------|-------------|--------------------|
| <b>Retroelements</b>                  | 297                | 44474       | 0.88               |
| <u>SINEs:</u>                         | 62                 | 7243        | 0.14               |
| Penelope                              | 24                 | 2135        | 0.04               |
| <u>LINEs:</u>                         | 159                | 29857       | 0.59               |
| CRE/SLACS                             | 0                  | 0           | 0.00               |
| L2/CR1/Rex                            | 95                 | 15861       | 0.31               |
| R1/LOA/Jockey                         | 0                  | 0           | 0.00               |
| R2/R4/NeSL                            | 6                  | 1580        | 0.03               |
| RTE/Bov-B                             | 26                 | 8435        | 0.17               |
| L1/CIN4                               | 8                  | 1846        | 0.04               |
| <u>LTR elements:</u>                  | 76                 | 7374        | 0.15               |
| BEL/Pao                               | 1                  | 84          | 0.00               |
| Ty1/Copia                             | 0                  | 0           | 0.00               |
| Gypsy/DIRS1                           | 17                 | 1347        | 0.03               |
| Retroviral                            | 56                 | 5859        | 0.12               |
| <b>DNA transposons</b>                | 148                | 18708       | 0.37               |
| hobo-Activator                        | 94                 | 11341       | 0.22               |
| Tc1-IS630-Pogo                        | 40                 | 6558        | 0.13               |
| En-Spm                                | 0                  | 0           | 0.00               |
| MuDR-IS905                            | 0                  | 0           | 0.00               |
| PiggyBac                              | 2                  | 103         | 0.00               |
| Tourist/Harbinger                     | 1                  | 136         | 0.00               |
| Other (Mirage,<br>P-element, Transib) | 0                  | 0           | 0.00               |
| <b>Rolling-circles</b>                | 0                  | 0           | 0.00               |
| <b>Unclassified:</b>                  | 3                  | 316         | 0.01               |
| <b>Total interspersed repeats:</b>    |                    | 63498       | 1.26               |
| <b>Small RNA:</b>                     | 18                 | 5082        | 0.10               |
| <b>Satellites:</b>                    | 7                  | 1177        | 0.02               |
| <b>Simple repeats:</b>                | 275                | 11819       | 0.23               |
| <b>Low complexity:</b>                | 432                | 15728       | 0.31               |

**Table S2.** RepeatMasker usage results and features of the sequence elements masked in the neonate *C. s. simus* venom gland transcriptomes. Total contigs analyzed: 6047; Total length of sequences: 3391553 nucleotides; GC level: 42.1%; number of bases masked: 65742 (1.94% of the total newborn *C. s. simus* venom gland transcriptome).

|                                       | number of elements | nucleotides | % contig sequences |
|---------------------------------------|--------------------|-------------|--------------------|
| <b>Retroelements</b>                  | 189                | 28724       | 0.85               |
| <u>SINEs:</u>                         | 33                 | 3873        | 0.11               |
| Penelope                              | 12                 | 929         | 0.03               |
| <u>LINEs:</u>                         | 95                 | 18524       | 0.55               |
| CRE/SLACS                             | 0                  | 0           | 0.00               |
| L2/CR1/Rex                            | 59                 | 9771        | 0.29               |
| R1/LOA/Jockey                         | 0                  | 0           | 0.00               |
| R2/R4/NeSL                            | 3                  | 834         | 0.02               |
| RTE/Bov-B                             | 16                 | 6197        | 0.18               |
| L1/CIN4                               | 6                  | 846         | 0.02               |
| <u>LTR elements:</u>                  | 61                 | 6327        | 0.19               |
| BEL/Pao                               | 3                  | 377         | 0.01               |
| Ty1/Copia                             | 0                  | 0           | 0.00               |
| Gypsy/DIRS1                           | 17                 | 2063        | 0.06               |
| Retroviral                            | 39                 | 3803        | 0.11               |
| <b>DNA transposons</b>                | 96                 | 9494        | 0.28               |
| hobo-Activator                        | 63                 | 5348        | 0.16               |
| Tc1-IS630-Pogo                        | 22                 | 3686        | 0.11               |
| En-Spm                                | 0                  | 0           | 0.00               |
| MuDR-IS905                            | 0                  | 0           | 0.00               |
| PiggyBac                              | 1                  | 55          | 0.00               |
| Tourist/Harbinger                     | 0                  | 0           | 0.00               |
| Other (Mirage,<br>P-element, Transib) | 0                  | 0           | 0.00               |
| <b>Rolling-circles</b>                | 0                  | 0           | 0.00               |
| <b>Unclassified:</b>                  | 2                  | 157         | 0.00               |
| <b>Total interspersed repeats:</b>    |                    | 38375       | 1.13               |
| <b>Small RNA:</b>                     | 50                 | 11190       | 0.33               |
| <b>Satellites:</b>                    | 6                  | 965         | 0.03               |
| <b>Simple repeats:</b>                | 172                | 6799        | 0.20               |
| <b>Low complexity:</b>                | 221                | 8557        | 0.25               |
