# Supplementary material for: Integrated “omics” profiling indicates that miRNAs are modulators of the ontogenetic venom composition shift in the Central American rattlesnake, Crotalus simus simus
Source: PubMed Central journal article supplement (PMC3660174; doi:10.1186/1471-2164-14-234), 2013-04-10
Supplement: 1471-2164-14-234-S2.pdf [file 1471-2164-14-234-S2.pdf]

**Table S3**

Relative abundances of the different venom protein family hits in the venom gland transcriptomes of newborn and adult *C. s. simus*. Abbreviations: 5'-NTase, 5'-nucleotidase; BPP, bradykinin potentiating peptide; CRISP, cysteine-rich secretory protein; CTL, C-type lectin-like protein; GC, glutaminyl cyclase; HYA, hyaluronidase; KUN, Kunitz-type inhibitor; LAO, L-amino acid oxidase; NGF, nerve growth factor; OHA, ohanin; PDE, phosphodiesterase; PLA<sub>2</sub>, phospholipase A<sub>2</sub>; SVMP, snake venom metalloproteinase; CRO, crotonamine; SP, serine proteinase; 3FTX, three-finger toxin; VEGF, vascular endothelial growth factor.

|          | Newborn |       |            |      | Adult   |       |            |      |
|----------|---------|-------|------------|------|---------|-------|------------|------|
|          | Contigs | Reads | Singletons | %    | Contigs | Reads | Singletons | %    |
| 5'-NTase | 2       | 411   | 1          | 0.04 | 3       | 465   | 3          | 0.09 |
| BPP      | 6       | 1,900 | 5          | 0.18 | 9       | 675   | 10         | 0.13 |
| CRISP    | 5       | 76    | 0          | 0.01 | 0       | 0     | 1          | 0    |
| CTL      | 8       | 591   | 7          | 0.06 | 18      | 1,969 | 6          | 0.38 |
| GC       | 1       | 143   | 2          | 0.01 | 3       | 348   | 3          | 0.07 |
| HYA      | 3       | 416   | 8          | 0.04 | 5       | 395   | 2          | 0.08 |

|                  |     |         |     |       |     |         |     |       |
|------------------|-----|---------|-----|-------|-----|---------|-----|-------|
| KUN              | 4   | 61      | 0   | 0.01  | 4   | 344     | 4   | 0.07  |
| LAO              | 1   | 1,300   | 2   | 0.12  | 3   | 1,582   | 10  | 0.31  |
| NGF              | 3   | 1,072   | 0   | 0.10  | 7   | 3,192   | 8   | 0.62  |
| OHA              | 3   | 110     | 26  | 0.01  | 5   | 81      | 68  | 0.03  |
| PDE              | 1   | 308     | 0   | 0.03  | 1   | 77      | 0   | 0.01  |
| PLA <sub>2</sub> | 81  | 161,494 | 72  | 15.29 | 36  | 29,721  | 29  | 5.75  |
| SVMP             | 92  | 129,838 | 100 | 12.30 | 123 | 161,789 | 87  | 31.27 |
| CRO              | 0   | 0       | 1   | 0     | 1   | 7       | 2   | 0.001 |
| SP               | 438 | 756,185 | 278 | 71.58 | 201 | 316,882 | 136 | 61.24 |
| 3FTX             | 4   | 44      | 18  | 0.01  | 5   | 93      | 49  | 0.03  |
| VEGF             | 6   | 2,792   | 6   | 0.26  | 7   | 38      | 13  | 0.01  |

---

**Table S4**

NoiSeq computed expression profile of highly expressed miRNAs in the venom gland transcriptome listed by decreasing newborn (N) to adult (A) expression ratio.

| <b>Cluster Newborn</b> | <b>Cluster Adult</b> | <b>Counts<br/>Newborn</b> | <b>Counts<br/>Adult</b> | <b>Ratio<br/>N / A</b> | <b>Sequence</b>                       |
|------------------------|----------------------|---------------------------|-------------------------|------------------------|---------------------------------------|
| Cluster 120            | Cluster 713          | 1,002                     | 123                     | 8.14                   | GTGGGTTCCGGGAGGGGACCGCCG              |
| Cluster 804            | Cluster 32637        | 456                       | 109                     | 4.18                   | TGAGGTAGTAGGTTGTATAGTTA               |
| Cluster 542            | Cluster 3288         | 3,582                     | 901                     | 3.97                   | ACGCGGGAGACCGGGGTTCTGA                |
| Cluster 462            | Cluster 2747         | 819                       | 221                     | 3.70                   | TGGGTTTCGCCCCGAGAGAGGGGCCCGCGC        |
| Cluster 752            | Cluster 620          | 415                       | 115                     | 3.60                   | AGCTGAAGAGGAAAACAACACTTTCCTTAGTGACACC |
| Cluster 2675           | Cluster 2609         | 582                       | 165                     | 3.52                   | TGGAGCCGGGCGTGGAATGCGAGACGCCTAG       |
| Cluster 825            | Cluster 434          | 430                       | 149                     | 2.88                   | GGACCCGAAAGATGGTGA ACTATGCCTGGGCA     |
| Cluster 253            | Cluster 134          | 4,717                     | 1,747                   | 2.7                    | AGCTGAAGAGGAAAACAACACTTTCCTTAGTGACCA  |
| Cluster 1867           | Cluster 1923         | 315                       | 125                     | 2.52                   | AGAGTGTTCAAAGCAGG                     |
| Cluster 5022           | Cluster 4379         | 251                       | 100                     | 2.51                   | CCCGCGGAGCAGAAGGGCA                   |
| Cluster 13195          | Cluster 19265        | 380                       | 155                     | 2.45                   | AGTGACGCGCATGAATGG                    |

|               |               |       |       |      |                                          |
|---------------|---------------|-------|-------|------|------------------------------------------|
| Cluster 499   | Cluster 12083 | 237   | 100   | 2.37 | TCACGCGGGAGACCGGGGTTCGA                  |
| Cluster 1     | Cluster 86    | 995   | 424   | 2.34 | CTGATCGTTTTTTTCACTTACCCGGTGAGGCGGGGGGGCA |
| Cluster 11329 | Cluster 37134 | 1,728 | 748   | 2.31 | ATCCCACTTCTGACA                          |
| Cluster 84    | Cluster 125   | 284   | 124   | 2.29 | GTGCGCCTTGAAGCCTAG                       |
| Cluster 1825  | Cluster 20    | 260   | 119   | 2.18 | CGAAAGATGGTGA ACTATGCCTGGGC              |
| Cluster 763   | Cluster 1537  | 314   | 150   | 2.09 | GGCTGGTCCGATTGCAGTGGT                    |
| Cluster 875   | Cluster 13    | 427   | 211   | 2.02 | GCGGCGATTCCGGAGGCGAG                     |
| Cluster 9     | Cluster 17    | 408   | 207   | 1.97 | GCTGCAGACGAAAGCC                         |
| Cluster 18066 | Cluster 23837 | 194   | 101   | 1.92 | GCGTAGCCTGAGTAAGACAGCG                   |
| Cluster 14228 | Cluster 11523 | 337   | 180   | 1.87 | TGAGGTAGTAGATTGTATAGTTA                  |
| Cluster 5857  | Cluster 2817  | 301   | 163   | 1.84 | GGATCCCGAGGCCTCCGAGCGGAGGGCGCAC          |
| Cluster 1358  | Cluster 17802 | 271   | 148   | 1.83 | CACGCGGGAGACCGGGGTTCGA                   |
| Cluster 1030  | Cluster 980   | 176   | 100   | 1.76 | CTAGCGAAACCACAGCCA                       |
| Cluster 3503  | Cluster 3878  | 2,358 | 1,383 | 1.70 | GCATTGGTGGTTCAGTGGTAGAATTCTCGCC          |
| Cluster 1366  | Cluster 789   | 641   | 378   | 1.69 | AACGAGA ACTTTGAAGGCCGA                   |
| Cluster 322   | Cluster 1316  | 377   | 229   | 1.64 | ACGAGA ACTTTGAAGGCCGA                    |
| Cluster 4002  | Cluster 5732  | 173   | 116   | 1.49 | GACACGGAAAGGATTGACAGA                    |
| Cluster 15933 | Cluster 6108  | 297   | 201   | 1.47 | CGCGGGAAATGTGGCGTACGGAAGA                |
| Cluster 1162  | Cluster 1993  | 670   | 459   | 1.45 | CGCGGGAAATGTGGCGTA                       |
| Cluster 2302  | Cluster 22081 | 239   | 164   | 1.45 | CTGATCGTTTTTTTCACTTACCCGGA               |

|               |               |     |     |      |                                  |
|---------------|---------------|-----|-----|------|----------------------------------|
| Cluster 19406 | Cluster 36092 | 148 | 102 | 1.45 | GCAGTCCATGGGCATATACA             |
| Cluster 769   | Cluster 664   | 448 | 309 | 1.44 | CCGACCATAAACGATGCCGACTAGCGA      |
| Cluster 276   | Cluster 364   | 146 | 102 | 1.43 | TGACGTGCAAATCGGTTCGTCCGACCTGGGTA |
| Cluster 12083 | Cluster 14408 | 144 | 108 | 1.33 | CGTGCATTTATCAGACCAAAACCAACCA     |
| Cluster 1943  | Cluster 7144  | 156 | 124 | 1.25 | GGACCGGCGCAAGACGAC               |
| Cluster 15116 | Cluster 18871 | 166 | 137 | 1.21 | GTAGAATAAGTGGGAGG                |
| Cluster 411   | Cluster 168   | 260 | 216 | 1.20 | TCCGACCATAAACGATGCCGACTAGCGA     |
| Cluster 1528  | Cluster 810   | 402 | 335 | 1.20 | TAAGGCGCCCGATGCCGACGCTCATCAGAC   |

---

**Table S5**

NoiSeq computed expression profile of highly expressed miRNAs in the venom gland transcriptome listed by decreasing adult (A) to newborn (N) expression ratio.

| <b>Cluster Newborn</b> | <b>Cluster Adult</b> | <b>Counts<br/>Newborn</b> | <b>Counts<br/>Adult</b> | <b>Ratio<br/>A / N</b> | <b>Sequence</b>                   |
|------------------------|----------------------|---------------------------|-------------------------|------------------------|-----------------------------------|
| Cluster 4562           | Cluster 3477         | 255                       | 3,420                   | 13.41                  | TAGCTTATCAGACTGATGTTG             |
| Cluster 24153          | Cluster 39368        | 411                       | 4,067                   | 9.89                   | TCTCCAACCTTGTACCAGTA              |
| Cluster 2064           | Cluster 1899         | 104                       | 937                     | 9                      | CGCGGTGGGACGCGGGAAATGTGGCGTACGGA  |
| Cluster 5420           | Cluster 9100         | 464                       | 3,621                   | 7.80                   | GAGTAAGACAGCGAGACCCAGA            |
| Cluster 4648           | Cluster 4753         | 133                       | 965                     | 7.25                   | AGGCGTCCAGTGCGGTAACGCGA           |
| Cluster 528            | Cluster 234          | 718                       | 5,110                   | 7.11                   | ATCACATTGCCAGGGATTACCA            |
| Cluster 20610          | Cluster 30365        | 524                       | 3,401                   | 6.49                   | CAACGGAATCCCAAAGCAGCTA            |
| Cluster 20407          | Cluster 27405        | 395                       | 2,414                   | 6.11                   | AACCCGTAGATCCGAACTTGCGA           |
| Cluster 2643           | Cluster 3504         | 178                       | 1,077                   | 6.05                   | TTCAAGTAATCCAGGATAGGCA            |
| Cluster 9004           | Cluster 11537        | 420                       | 2,409                   | 5.73                   | CGTCCAGTGCGGTAACGCGAC             |
| Cluster 3877           | Cluster 3156         | 142                       | 786                     | 5.53                   | TCCCATATGGTCTAGCGGTTAGGATTCCTGGTA |

|               |               |       |       |      |                                  |
|---------------|---------------|-------|-------|------|----------------------------------|
| Cluster 467   | Cluster 308   | 341   | 1,771 | 5.19 | GCTGCCGGTGAAATACCACTA            |
| Cluster 3989  | Cluster 4834  | 147   | 740   | 5.03 | CATCTAAGGCTAAATACCGGCACGA        |
| Cluster 4317  | Cluster 6564  | 1,504 | 7,252 | 4.82 | GCGCCGCTGGTGTAGTGGTATCATGCA      |
| Cluster 14    | Cluster 104   | 212   | 984   | 4.64 | TGGCCCTTGAAAATCCGGGGGAGATGG      |
| Cluster 113   | Cluster 404   | 256   | 1,180 | 4.60 | GCCGACAGGTGCGGGTA                |
| Cluster 422   | Cluster 2215  | 1,532 | 6,707 | 4.37 | TCTCCCAACCTTGTACCAGTG            |
| Cluster 17466 | Cluster 24163 | 1,307 | 5,623 | 4.30 | TGGCTCAGTTCAGCAGGAACAGTA         |
| Cluster 18109 | Cluster 32713 | 125   | 528   | 4.22 | CAGTGCAATGTAAAAAGGGCAT           |
| Cluster 1979  | Cluster 983   | 114   | 479   | 4.20 | CCGCGGTGGGACGCGGGAAATGTGGCGTACGG |
| Cluster 5185  | Cluster 8848  | 602   | 2,504 | 4.15 | GTCCAGTGCGGTAACGCGACCGA          |
| Cluster 22352 | Cluster 33768 | 301   | 1,200 | 3.98 | CAACGGAATCCCAAAAAGCAGCA          |
| Cluster 22230 | Cluster 35698 | 141   | 533   | 3.78 | TCTCCCAACCTTGTACCAGTA            |
| Cluster 176   | Cluster 1597  | 163   | 604   | 3.70 | CGACAGGTGCGGGTA                  |
| Cluster 3894  | Cluster 69    | 122   | 438   | 3.59 | GGTTCCATAGTGTAGTGGTTATCACGTCTGC  |
| Cluster 1267  | Cluster 8551  | 271   | 990   | 3.54 | CAACGGAATCCCAAAAAGCAGCTG         |
| Cluster 4274  | Cluster 1269  | 134   | 450   | 3.35 | GCGAGGCGTCCAGTGCAGGTAACGCGAC     |
| Cluster 8665  | Cluster 20781 | 753   | 2509  | 3.33 | TTCAAGTAATCCAGGATAGGCTA          |
| Cluster 3103  | Cluster 26193 | 1,005 | 3,223 | 3.20 | TAGCAGCACGTAAATACTGGAG           |

---

**Table S6**

MiRanda predicted miRNAs complementary of 3'-UTR loci of 454 *C. s. simus* venom transcripts

| <b>Newborn Cluster ID</b> | <b>Contig Map</b> | <b>Best Blast Hit Description</b> | <b>Adult Cluster ID</b> | <b>Contig Map</b> | <b>Best Blast Hit Description</b> |
|---------------------------|-------------------|-----------------------------------|-------------------------|-------------------|-----------------------------------|
| New 752                   | contig00479       | M89784   Atrolysin e              | Ad 620                  | contig00703       | AF378289   SVMP Clone Mol(c)      |
|                           | contig00484       | M89784   Atrolysin e              |                         | contig00819       | M89784   Atrolysin e              |
|                           | contig03129       | AB059571   Elegantin-1a           |                         | contig00790       | D28871   Prepro-halystatin 2 & 3  |
|                           | contig03089       | GQ451440   SVMP VMP-II            |                         | contig00791       | HM443640   SVMP MP_IIx2           |
|                           | contig00483       | M89784   Atrolysin e              |                         | contig00808       | GQ451439   SVMP VMP-III           |
|                           | contig03079       | GQ451440   SVMP VMP-II            |                         | contig00691       | GQ451439   SVMP VMP-III           |
| New 253                   | contig00479       | M89784   Atrolysin e              | Ad 134                  | contig00703       | AF378289   SVMP Clone Mol(c)      |
|                           | contig00484       | M89784   Atrolysin e              |                         | contig00819       | M89784   Atrolysin e              |
|                           | contig03129       | AB059571   Elegantin-1a           |                         | contig00790       | D28871   Prepro-halystatin 2 & 3  |
|                           | contig00483       | M89784   Atrolysin e              |                         | contig00791       | HM443640   SVMP MP_IIx2           |
|                           |                   |                                   |                         | contig00808       | GQ451439   SVMP VMP-III           |
|                           |                   |                                   |                         | contig00691       | GQ451439   SVMP VMP-III           |



|          |             |                                  |                              |             |                              |
|----------|-------------|----------------------------------|------------------------------|-------------|------------------------------|
| New 3503 | contig03089 | GQ451440   SVMP VMP-II           | Ad 2817                      | contig00886 | M89784   Atrolysin e         |
|          | contig03090 | D28871   Prepro-halystatin 2 & 3 |                              | contig00712 | M89784   Atrolysin e         |
|          | contig03078 | HM443642   SVMP MP_IIa           |                              | contig00964 | GQ451443   disint precursor  |
| New 87   | contig04061 | GQ451441   SVMP VMP-III          | Ad 222                       | contig00886 | M89784   Atrolysin e         |
|          | contig03230 | GQ451441   SVMP VMP-III          |                              | contig00712 | M89784   Atrolysin e         |
|          | contig00479 | M89784   Atrolysin e             |                              | contig00703 | AF378289   SVMP Clone Mol(c) |
|          | contig00484 | M89784   Atrolysin e             |                              | contig00819 | M89784   Atrolysin e         |
|          | contig03434 | AB042840   Vap-1                 |                              | contig00936 | AF117637   SVMP MD2          |
|          |             |                                  |                              | contig00699 | U86634   SVMP-disint-like    |
|          |             |                                  |                              | contig00948 | AF378290   SVMP Clone Mol(d) |
|          |             | contig00780                      | GQ451439   SVMP VMP-III      |             |                              |
| New 166  | contig00479 | M89784   Atrolysin e             | Ad 44                        | contig00886 | M89784   Atrolysin e         |
|          | contig00484 | M89784   Atrolysin e             |                              | contig00712 | M89784   Atrolysin e         |
|          | contig03434 | AB042840   Vap-1                 |                              | contig00703 | AF378289   SVMP Clone Mol(c) |
|          |             |                                  |                              | contig00819 | M89784   Atrolysin e         |
|          |             |                                  |                              | contig00699 | U86634   SVMP-disint-like    |
|          |             | contig00948                      | AF378290   SVMP Clone Mol(d) |             |                              |

|                  |             |                                                                   | contig00780 | GQ451439   SVMP VMP-III |
|------------------|-------------|-------------------------------------------------------------------|-------------|-------------------------|
| New 2681         | contig03079 | GQ451440   SVMP VMP-II                                            |             |                         |
|                  | contig00775 | U01237   Atrolysin d                                              |             |                         |
| New 3708         | contig03089 | GQ451440   SVMP VMP-II                                            |             |                         |
|                  | contig03090 | D28871   Prepro-halystatin 2 & 3                                  |             |                         |
|                  | contig03078 | HM443642   SVMP MP_IIa                                            |             |                         |
| New 20           | contig00479 | M89784   Atrolysin e                                              |             |                         |
|                  | contig00484 | M89784   Atrolysin e                                              |             |                         |
|                  | contig03434 | AB042840   Vap 1                                                  |             |                         |
|                  | contig01298 | M89784   Atrolysin e                                              |             |                         |
|                  | contig03228 | GQ451441   SVMP VMP-III                                           |             |                         |
| Ad 368/New 299   | contig02859 | X12603   Crotalus durissus terrificus RNA for crotoxin B          |             |                         |
|                  | contig02858 | X12603   Crotalus durissus terrificus RNA for crotoxin B          |             |                         |
| Ad 1078/New 1849 | contig01024 | U01027   Crotalus scutulatus scutulatus Mojave Toxin subunit gene |             |                         |
|                  | contig00975 | U01026   Crotalus scutulatus scutulatus Mojave Toxin subunit gene |             |                         |
|                  | contig00986 | AF269131   Crotalus atrox acidic phospholipase A2 precursor mRNA  |             |                         |
|                  | contig00974 | U01026   Crotalus scutulatus scutulatus Mojave Toxin subunit gene |             |                         |
| Ad 2166          | contig02859 | X12603   Crotalus durissus terrificus RNA for crotoxin B          |             |                         |
|                  | contig02858 | X12603   Crotalus durissus terrificus RNA for crotoxin B          |             |                         |

|                  |             |                                                                                  |
|------------------|-------------|----------------------------------------------------------------------------------|
|                  | contig01024 | U01027   <i>Crotalus scutulatus scutulatus</i> Mojave Toxin subunit gene         |
|                  | contig01004 | U01027   <i>Crotalus scutulatus scutulatus</i> Mojave Toxin subunit gene         |
| New 4393/Ad 3416 | contig03089 | GQ451440   <i>Crotalus viridis viridis</i> metalloproteinase VMP-II precursor    |
|                  | contig03090 | D28871   AGKAHB <i>Gloydus halys</i> gene for prepro-halystatin 2 and 3          |
|                  | contig03078 | HM443642   <i>Bothrops neuwiedi</i> MP_IIa SVMP precursor                        |
| New 2578         | contig03130 | U01234   CRLPREHTA <i>Crotalus atrox</i> hemorrhagic toxin a, atrolysin a (Ht-a) |
|                  | contig03228 | GQ451441   <i>Agkistrodon piscivorus leucostoma</i> metalloproteinase VMP-III    |
|                  | contig03079 | GQ451440   <i>Crotalus viridis viridis</i> metalloproteinase VMP-II precursor    |
|                  | contig03128 | GQ451443   <i>Agkistrodon piscivorus leucostoma</i> disintegrin precursor        |
